# Supplementary material for: An optimized protocol for in vitro and in cellulo structural determination of the multi-tRNA synthetase complex by cross-linking mass spectrometry
Source: PubMed Central journal article supplement — STAR Protoc. 2022 Mar 9;3(1):101201. doi: 10.1016/j.xpro.2022.101201 (PMC8914369; doi:10.1016/j.xpro.2022.101201), 2022-03-09
Supplement: mmc2.pdf [file mmc2.pdf]

Table S2. Intermolecular Lys-Lys crosslinks. Related to step 47.

| <b>Peptide A</b>                              | <b>Peptide B</b>                             | <i>In cellulo</i><br><b>Cross-linking</b> | <i>In vitro</i><br><b>Cross-linking</b> |
|-----------------------------------------------|----------------------------------------------|-------------------------------------------|-----------------------------------------|
| <b>AIMP1 – RARS1</b>                          |                                              |                                           |                                         |
| IEK <sub>129</sub> K                          | LMDLLGEGLK <sub>471</sub> R                  | -                                         | +                                       |
| <b>AIMP2 – KARS1</b>                          |                                              |                                           |                                         |
| PMYQVK <sub>7</sub> PYHGGGAPL<br>R            | SK <sub>249</sub> ITYIR                      | -                                         | +                                       |
| SY <sub>35</sub> GPAPGAGHVQEEES<br>NLSLQALESR | SK <sub>249</sub> ITYIR                      | -                                         | +                                       |
| QDDILK <sub>64</sub> R                        | SK <sub>249</sub> ITYIR                      | -                                         | +                                       |
| <b>AIMP2 – QARS1</b>                          |                                              |                                           |                                         |
| QDDILK <sub>64</sub> R                        | LGYFSVDPDASHQGGK <sub>759</sub> LVFN<br>R    | -                                         | +                                       |
| <b>AIMP3 – DARS1</b>                          |                                              |                                           |                                         |
| EK <sub>138</sub> YLNVSER                     | EAGVEMGDEDDLSTPNEK <sub>37</sub><br>4LLGHLVK | +                                         | +                                       |
| <b>DARS1 – MARS1</b>                          |                                              |                                           |                                         |
| ALHHGIDLEK <sub>451</sub> IK                  | IK <sub>729</sub> GSEADR                     | -                                         | +                                       |
| <b>DARS1 – QARS1</b>                          |                                              |                                           |                                         |
| SQEK <sub>13</sub> PR                         | FDDTNPEK <sub>309</sub> EEAK                 | -                                         | +                                       |
| <b>EPRS – QARS1</b>                           |                                              |                                           |                                         |
| FDDTNPEK <sub>243</sub> EKEDFEK               | MK <sub>405</sub> LVMEDGK                    | +                                         | -                                       |
| AYVDDTPAEQMK <sub>300</sub> AE<br>R           | MK <sub>405</sub> LVMEDGK                    | +                                         | +                                       |
| LNLNNTVLSK <sub>435</sub> R                   | MK <sub>405</sub> LVMEDGK                    | +                                         | -                                       |
| <b>IARS1 – LARS1</b>                          |                                              |                                           |                                         |
| TLK <sub>382</sub> EQGR                       | RVPVLGK <sub>1133</sub> EYTEK                | -                                         | +                                       |
| FGNWLK <sub>450</sub> DAR                     | RVPVLGK <sub>1133</sub> EYTEK                | +                                         | +                                       |
| <b>IARS1 – MARS1</b>                          |                                              |                                           |                                         |
| IQK <sub>996</sub> LR                         | IK <sub>729</sub> GSEADR                     | -                                         | +                                       |

|                                          |                                                  |   |   |
|------------------------------------------|--------------------------------------------------|---|---|
|                                          |                                                  |   |   |
| <b>IARS1 – RARS1</b>                     |                                                  |   |   |
| TLK <sub>382</sub> EQGR                  | K <sub>60</sub> SLQAER                           | - | + |
| KVTLSTDK <sub>885</sub> NK               | LNDYIFSFDK <sub>522</sub> MLDDRGNT<br>AAYLLYAFTR | + | - |
|                                          |                                                  |   |   |
| <b>LARS1 – RARS1</b>                     |                                                  |   |   |
| LMK <sub>1102</sub> MNR                  | LMDLLGEGLK <sub>471</sub> RSMDK                  | + | + |
|                                          |                                                  |   |   |
| <b>QARS1 – RARS1</b>                     |                                                  |   |   |
| LGYFSVDPDASHQGK <sub>759</sub> L<br>VFNR | LLQQEEEIK <sub>20</sub> SLTAEIDR                 | - | + |
| ETLK <sub>25</sub> NSALSAQLR             | LANIDEEMLQK <sub>557</sub> AAR                   | - | + |
|                                          |                                                  |   |   |
